# Supplementary material for: Thermodynamic properties of water in aqueous amine solutions studied by energy-representation method
Source: Royal Society of Chemistry journal article supplement (doi:10.1039/d5cp02422f), 2025-01-01
Supplement: d5cp02422f1.pdf [file d5cp02422f1.pdf]

## Supplementary Information: Thermodynamic properties of water in aqueous amine solutions studied by energy-representation method

Yuki Yokoyama, Keiji Yasuda and Tsuyoshi Yamaguchi\*

*Department of Chemical Systems Engineering, Graduate School of Engineering, Nagoya University,*

*Furo-cho, Chikusa, Nagoya, Aichi 464-8603, Japan.*

*E-mail: yamaguchi.tsuyoshi@material.nagoya-u.ac.jp*

### Contents

|                                                                                |    |
|--------------------------------------------------------------------------------|----|
| 1. Computational details.....                                                  | 2  |
| 2. Water vapor pressure .....                                                  | 3  |
| 3. Interaction between water and solvent molecules .....                       | 5  |
| 4. Temperature dependence of vapor pressure and enthalpy of vaporization ..... | 11 |
| 5. Concentration fluctuation of water and vapor pressure .....                 | 13 |

## 1. Computational details

Table S1 Number of molecules of each component in the solution

| EAE [wt%] | Before CO <sub>2</sub><br>absorption/carbamate |        | Bicarbonate(all) |        | Bicarbonate(half) |        |
|-----------|------------------------------------------------|--------|------------------|--------|-------------------|--------|
|           | water                                          | others | water            | others | water             | others |
| 0         | 3333                                           | 0      | 3333             | 0      | 3333              | 0      |
| 9.27      | 2984                                           | 62     | 2922             | 124    | 2953              | 93     |
| 18.7      | 2640                                           | 122    | 2518             | 244    | 2579              | 183    |
| 28.3      | 2300                                           | 182    | 2118             | 364    | 2209              | 273    |
| 38        | 1962                                           | 242    | 1720             | 484    | 1841              | 363    |
| 47.9      | 1622                                           | 302    | 1320             | 604    | 1471              | 453    |
| 58        | 1292                                           | 360    | 932              | 720    | 1112              | 540    |
| 68.2      | 964                                            | 418    | 546              | 836    | 755               | 627    |
| 78.6      | 636                                            | 476    | 160              | 952    | 398               | 714    |
| 83.2      | -                                              | -      | 0                | 846    | -                 | -      |
| 89.2      | 318                                            | 532    | -                | -      | 52                | 798    |
| 90.8      | -                                              | -      | -                | -      | 0                 | 750    |
| 100       | 0                                              | 588    | -                | -      | -                 | -      |

## 2. Water vapor pressure

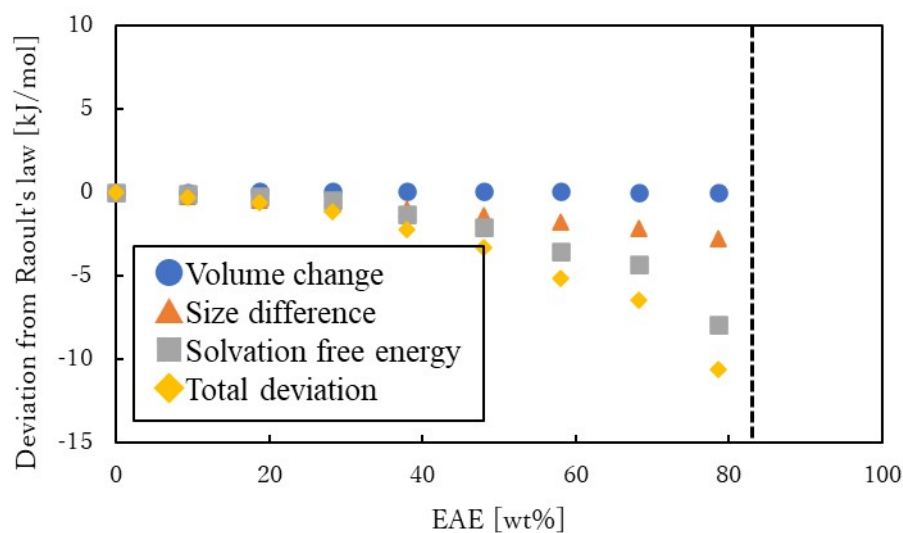

Figure S1 Deviations from Raoult's law and contributions from volume change, size difference, and solvation free energy after bicarbonate-type reaction (all). The vertical dashed line in the graph indicates the EAE concentration at which water is completely consumed by the reaction.

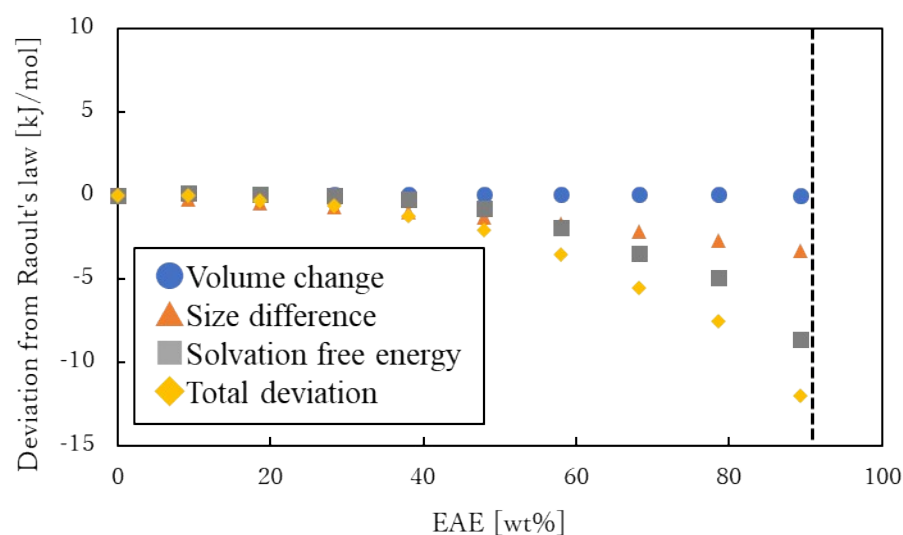

Figure S2 Deviations from Raoult's law and contributions from volume change, size difference, and solvation free energy after bicarbonate-type reaction (half). The vertical dashed line in the graph indicates the EAE concentration at which water is completely consumed by the reaction.

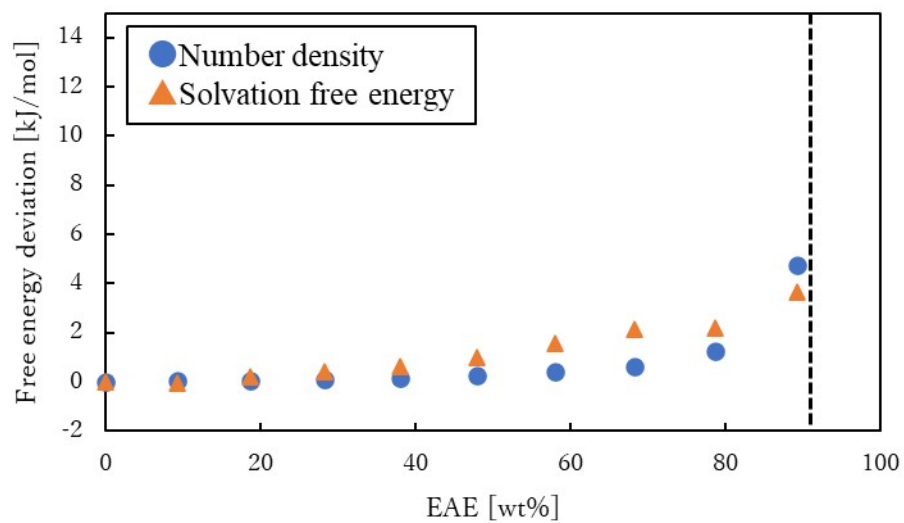

Figure S3 Contribution of water number density and solvation free energy to the difference in water vapor pressure between the carbamate-type and bicarbonate-type reaction (half). The vertical dashed line in the graph indicates the EAE concentration at which water is completely consumed by the reaction.

### 3. Interaction between water and solvent molecules

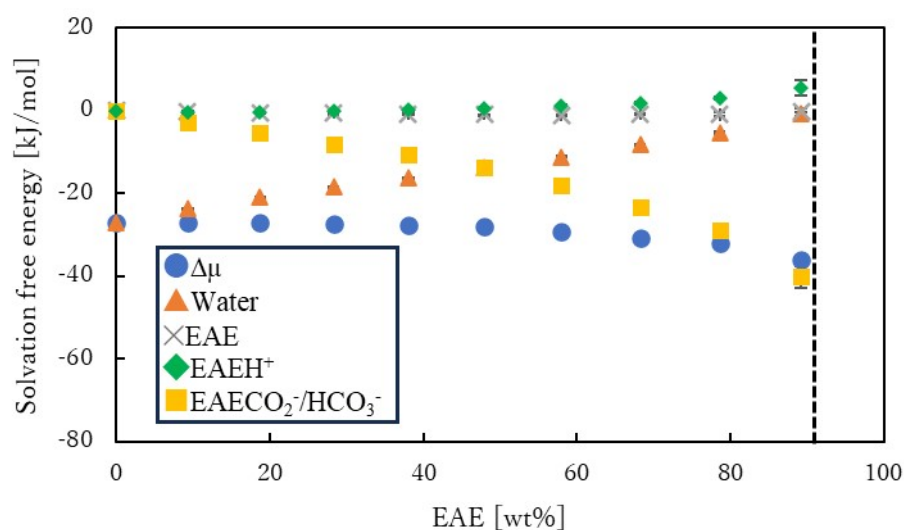

Figure S4 Solvation free energy of water( $\Delta\mu$ ) and contribution of each component after bicarbonate-type reaction (half). The vertical dashed line in the graph indicates the EAE concentration at which water is completely consumed by the reaction.

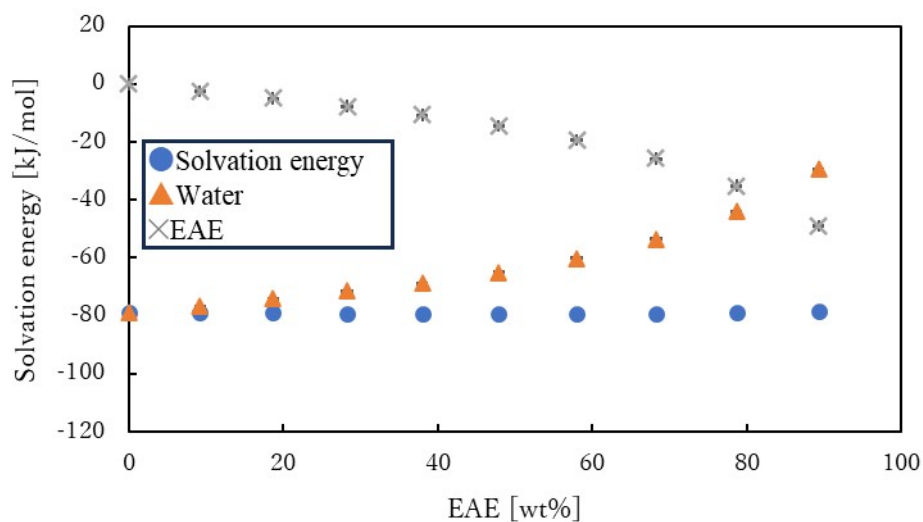

Figure S5 Solvation energy of water and contribution of each component before CO<sub>2</sub> absorption

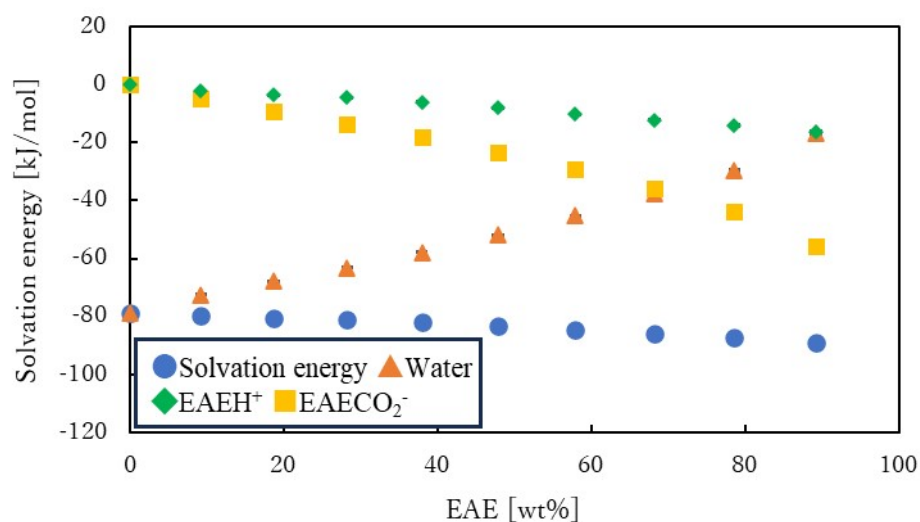

Figure S6 Solvation energy of water and contribution of each component after carbamate-type reaction

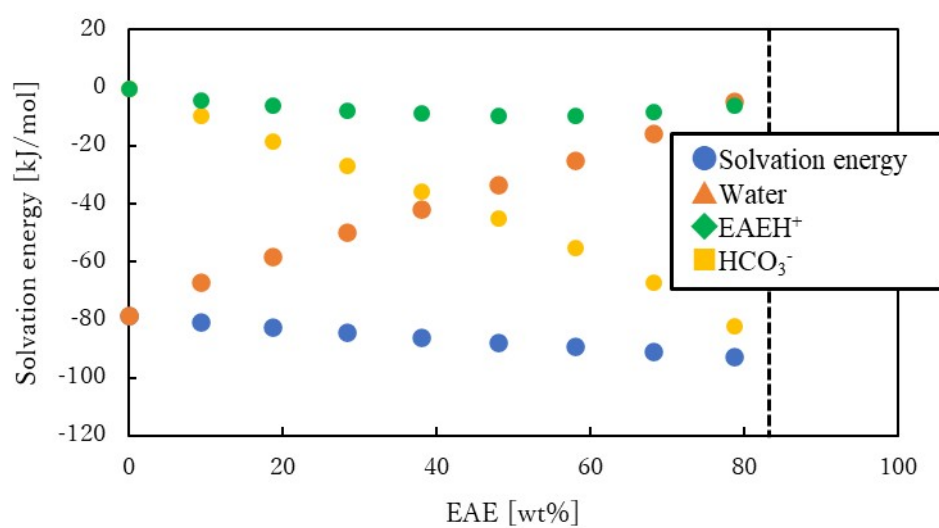

Figure S7 Solvation energy of water and contribution of each component after bicarbonate-type reaction (all). The vertical dashed line in the graph indicates the EAE concentration at which water is completely consumed by the reaction.

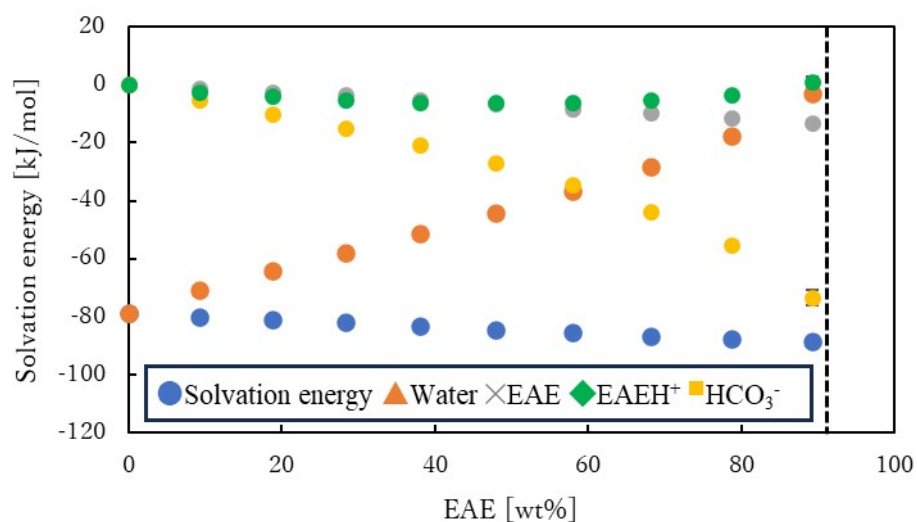

Figure S8 Solvation energy of water and contribution of each component after bicarbonate-type reaction (half). The vertical dashed line in the graph indicates the EAE concentration at which water is completely consumed by the reaction.

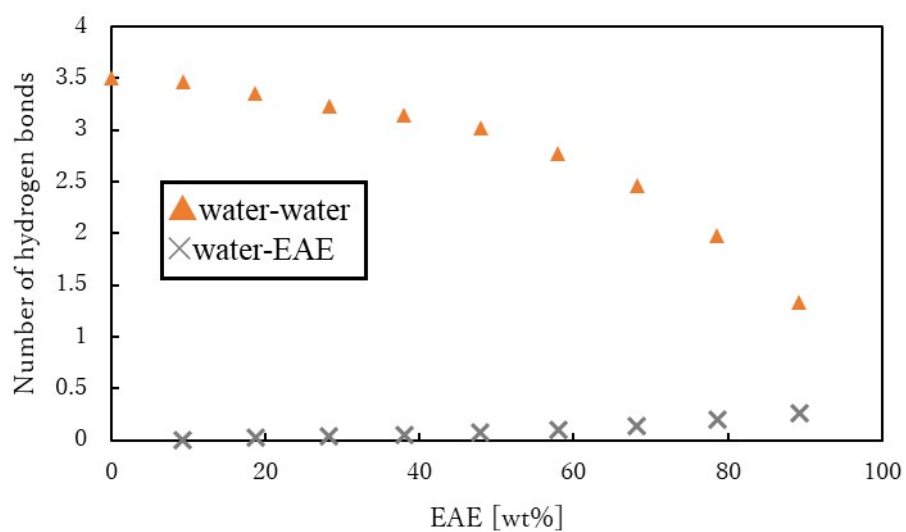

Figure S9 Number of hydrogen bonds before CO<sub>2</sub> absorption

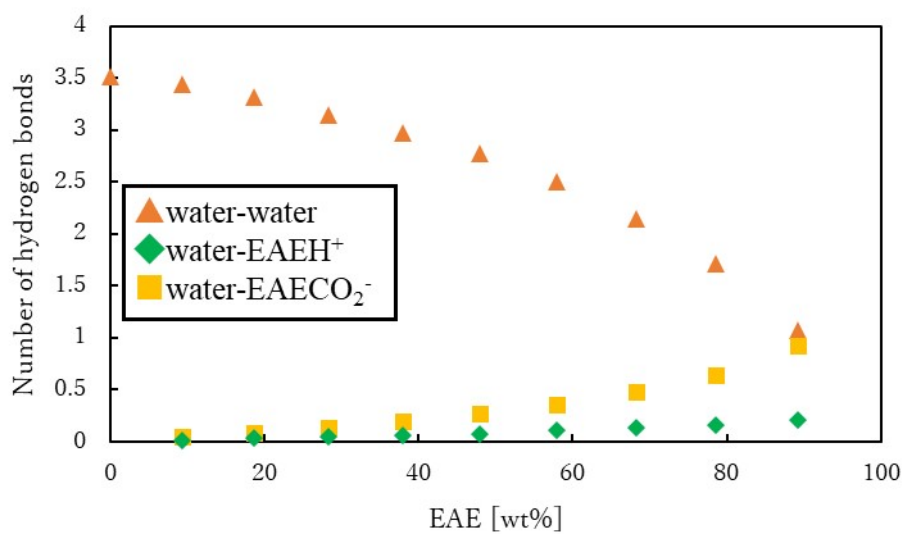

Figure S10 Number of hydrogen bonds after carbamate-type reaction

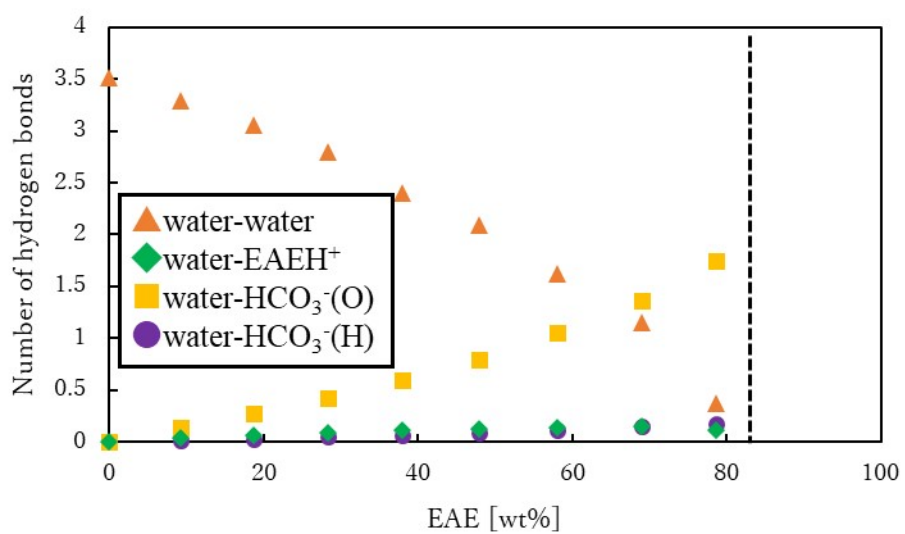

Figure S11 Number of hydrogen bonds after bicarbonate-type reaction (all). The vertical dashed line in the graph indicates the EAE concentration at which water is completely consumed by the reaction.



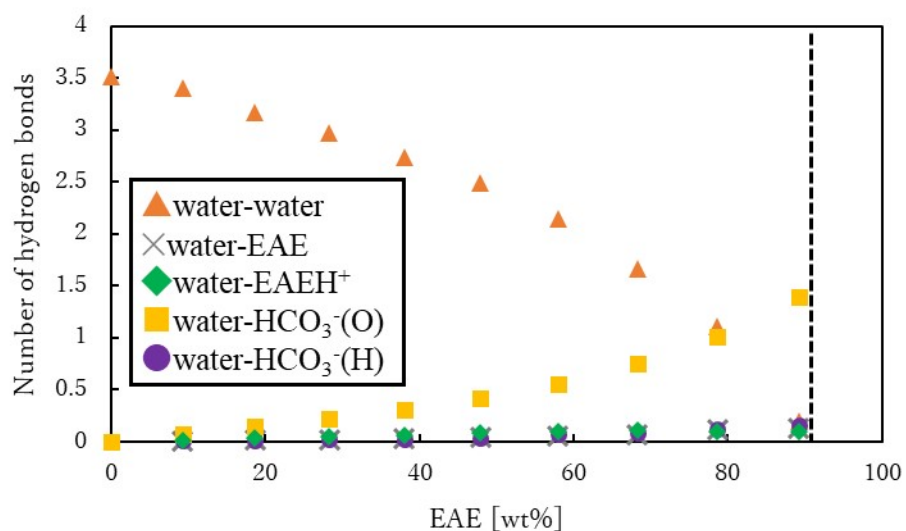

Figure S12 Number of hydrogen bonds after bicarbonate-type reaction (half). The vertical dashed line in the graph indicates the EAE concentration at which water is completely consumed by the reaction.

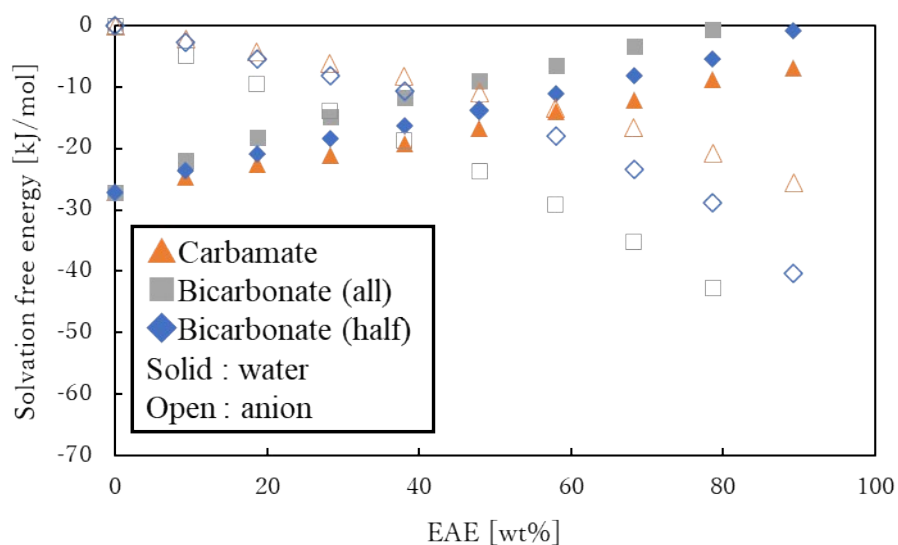

Figure S13 Contributions of water and anions to the solvation free energy

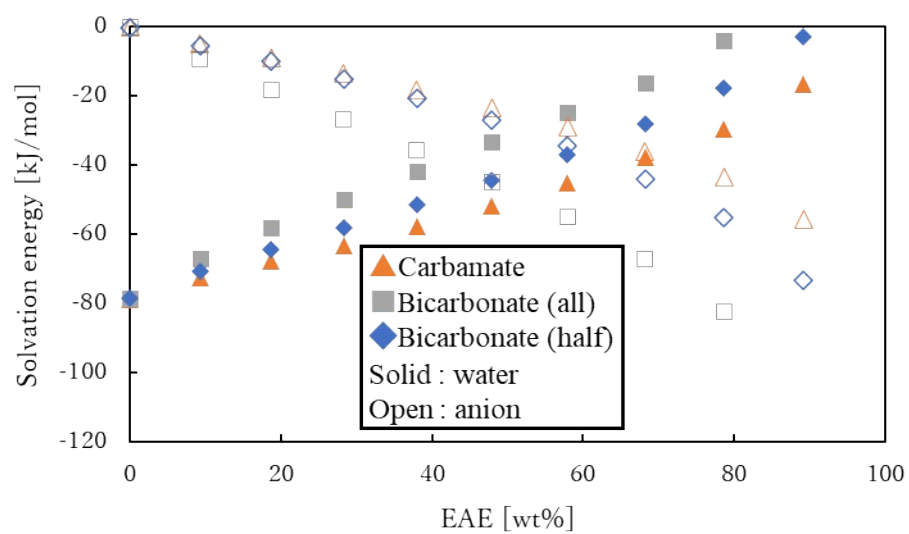

Figure S14 Contributions of water and anions to the solvation energy

#### 4. Temperature dependence of vapor pressure and enthalpy of vaporization

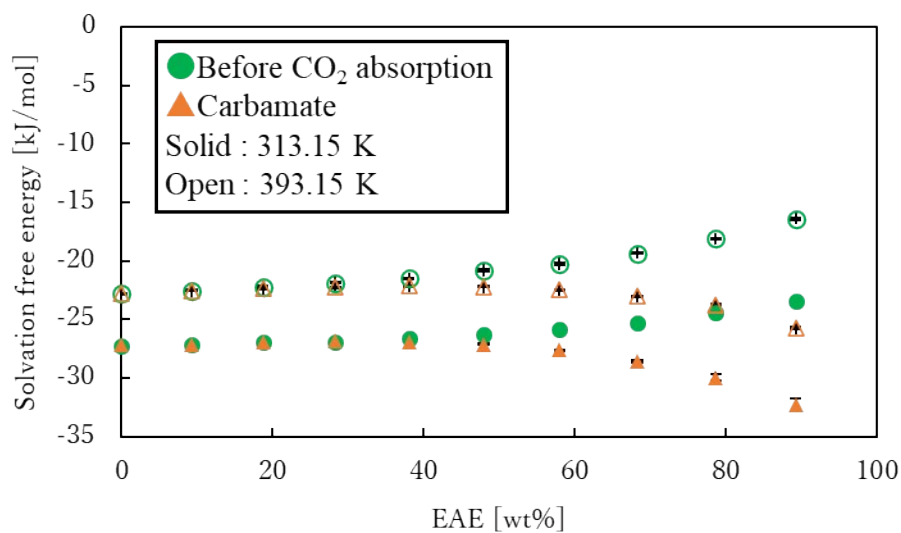

Figure S15 Temperature dependence of solvation free energy

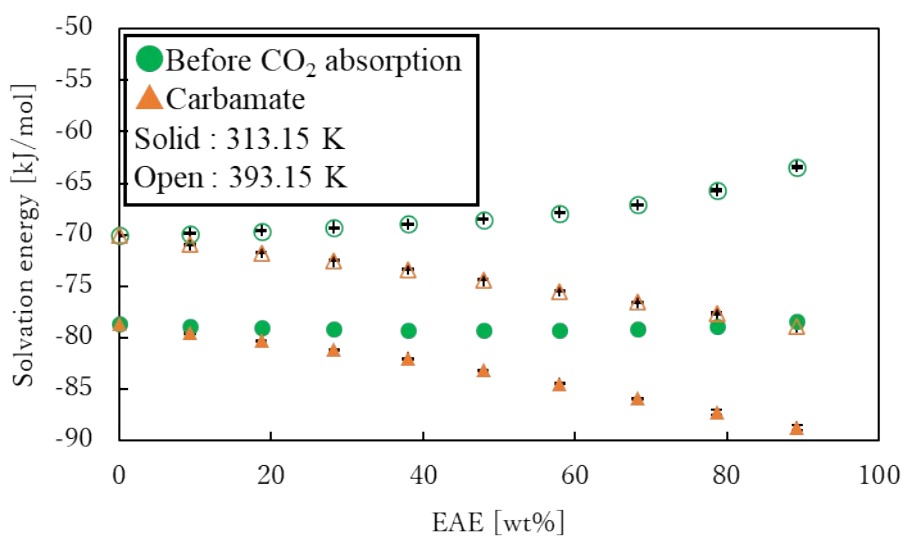

Figure S16 Temperature dependence of solvation energy

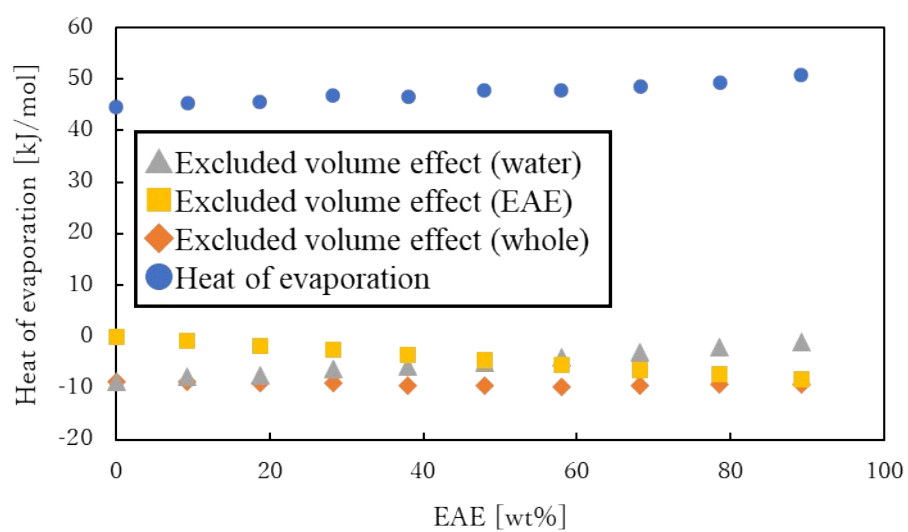

Figure S17 Excluded volume effect to the heat of evaporation

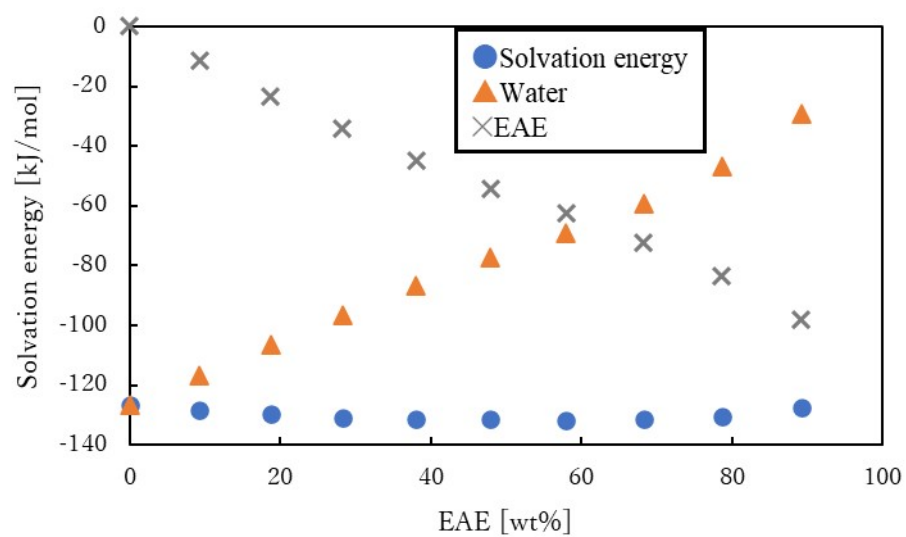

Figure S18 Solvation energy of EAE and contribution of each component before CO<sub>2</sub> absorption

## 5. Concentration fluctuation of water and vapor pressure

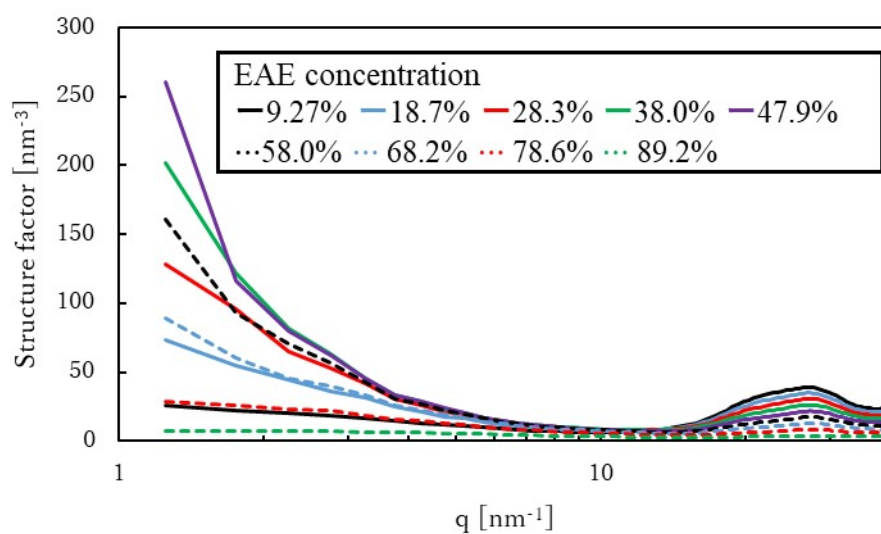

Figure S19 Structure factor before CO<sub>2</sub> absorption

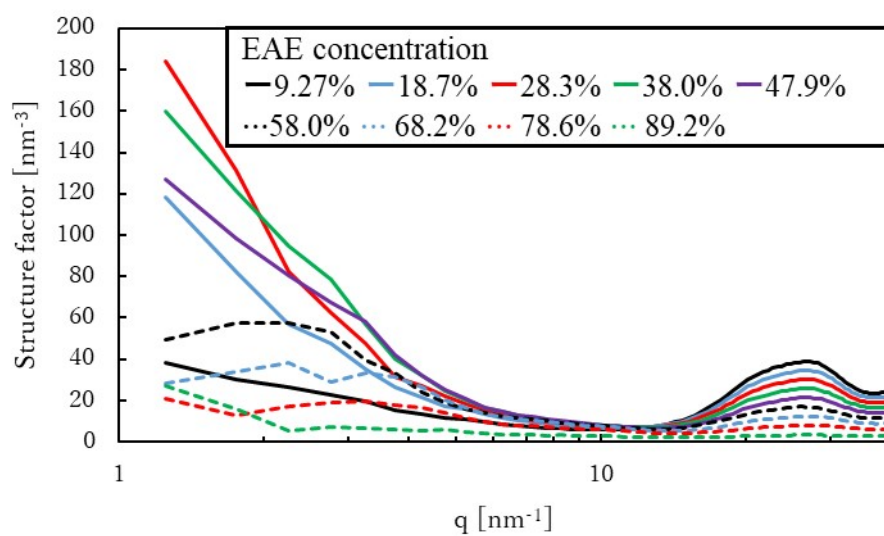

Figure S20 Structure factor after carbamate-type reaction

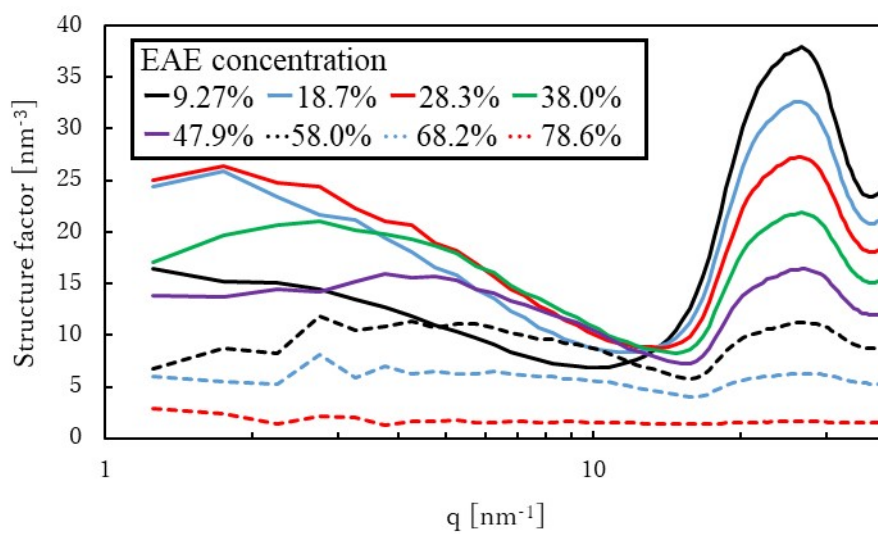

Figure S21 Structure factor after bicarbonate-type reaction (all)

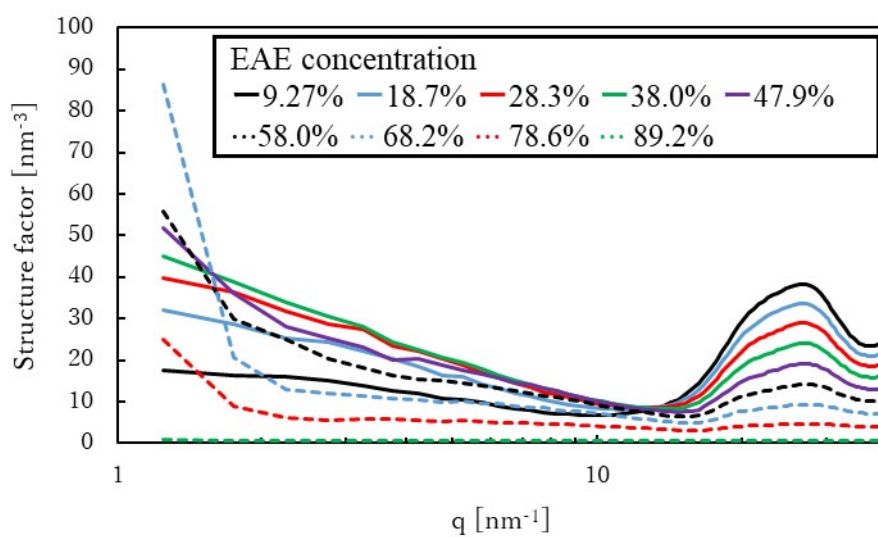

Figure S22 Structure factor after bicarbonate-type reaction (half)

Table S2 The  $q$  values (in nm<sup>-1</sup>) used for evaluation of concentration fluctuation in each solution

| EAE [wt%] | Before absorption | Carbamate | Bicarbonate (all) | Bicarbonate (half) |
|-----------|-------------------|-----------|-------------------|--------------------|
| 0         | 1.341             | 1.341     | 1.341             | 1.341              |
| 9.27      | 1.346             | 1.348     | 1.351             | 1.348              |
| 18.7      | 1.351             | 1.354     | 1.357             | 1.355              |
| 28.3      | 1.355             | 1.359     | 1.363             | 1.361              |
| 38        | 1.359             | 1.364     | 1.367             | 1.366              |
| 47.9      | 1.363             | 1.369     | 1.370             | 1.371              |
| 58        | 1.367             | 1.374     | 1.370             | 1.374              |
| 68.2      | 1.370             | 1.377     | 1.372             | 1.376              |
| 78.6      | 1.373             | 1.380     | 1.340             | 1.377              |
| 89.2      | 1.376             | 1.378     | -                 | 1.376              |
